# Supplementary material for: Structural Properties of the Caenorhabditis elegans Neuronal Network
Source: PubMed Central journal article supplement (PMC3033362; doi:10.1371/journal.pcbi.1001066), 2011-02-03
Supplement: pcbi.1001066.s004.pdf [file pcbi.1001066.s004.pdf]

# Text S4: Supporting Figures and Tables

**Table 1.** Connected components of the gap junction network. Note the single giant component and the large number of disconnected/isolated neurons.

**Giant Component (248 neurons)**

---

|        |         |         |         |        |        |         |          |            |
|--------|---------|---------|---------|--------|--------|---------|----------|------------|
| ADAL/R | ALNL    | AVG     | DD01-05 | PDA    | PVR    | RIVL/R  | SABVL/R  | URYVL/R    |
| ADEL/R | AQR     | AVHL/R  | DVA     | PDB    | PVT    | RMDDL/R | SDQL/R   | VA01-12    |
| ADFL/R | AS01-11 | AVJL/R  | DVB     | PDEL/R | PVWL/R | RMDL/R  | SIADL/R  | VB01-11    |
| ADLL/R | ASGL/R  | AVKL/R  | DVC     | PHAL/R | RIBL/R | RMDVL/R | SI AVL/R | VC01-05    |
| AFDL/R | ASHL/R  | AVL     | FLPL/R  | PHBL/R | RICL/R | RMED    | SIBDL/R  | VD01-10,13 |
| AIAL/R | ASIL/R  | AVM     | IL1DL/R | PHVL/R | RID    | RMEL/R  | SIBVL/R  |            |
| AIBL/R | ASKL/R  | AWAL/R  | IL1L/R  | PLML/R | RIFL/R | RMEV    | SMBDL/R  |            |
| AIML   | AUAL/R  | AWBL/R  | IL1VL/R | PQR    | RIGL/R | RMFL    | SMBVL/R  |            |
| AINL/R | AVAL/R  | BAGL/R  | IL2L/R  | PVCL/R | RIH    | RMGL/R  | SMDDL/R  |            |
| AIYL/R | AVBL/R  | CEPDL/R | LUAL/R  | PVM    | RIML/R | RMHL/R  | SMDVL/R  |            |
| AIZL/R | AVDL/R  | CEPVL/R | OLLL/R  | PVNL   | RIPL/R | SAADL/R | URBL/R   |            |
| ALA    | AVEL/R  | DA01-09 | OLQDL/R | PVPL/R | RIR    | SAAVL/R | URXL/R   |            |
| ALML/R | AVFL/R  | DB01-07 | OLQVL/R | PVQL/R | RIS    | SABD    | URYDL/R  |            |

**First Small Component (2 neurons)**

---

ASJL/R

**Second Small Component (3 neurons)**

---

HSNL/R PVNR

**Neurons with no gap junctions (26 neurons)**

---

|      |        |        |         |        |        |         |         |
|------|--------|--------|---------|--------|--------|---------|---------|
| AIMR | ASEL/R | BDUL/R | IL2DL/R | PLNL/R | RIAL/R | URADL/R | VD11-12 |
| ALNR | AWCL/R | DD06   | IL2VL/R | PVDL/R | RMFR   | URAVL/R |         |

**Table 2.** (A) Number of gap junction contacts between different neuron categories. (B) Percent of gap junctions on neurons of the row category that connect to neurons of the column category.

| <b>A</b> | Sensory | Inter- | Motor |
|----------|---------|--------|-------|
| Sensory  | 108     | 119    | 26    |
| Inter-   | 119     | 368    | 342   |
| Motor    | 26      | 342    | 324   |

| <b>B</b> | Sensory | Inter- | Motor |
|----------|---------|--------|-------|
| Sensory  | 42.7%   | 47.0%  | 10.3% |
| Inter-   | 14.4%   | 44.4%  | 41.3% |
| Motor    | 3.8%    | 49.4%  | 46.8% |

**Table 3.** (A) Number of chemical synapse contacts from row category to column category. (B) Percent of synapses in row category that synapse to column category.

| <b>A</b> | Sensory | Inter- | Motor | <b>B</b> | Sensory | Inter- | Motor |
|----------|---------|--------|-------|----------|---------|--------|-------|
| Sensory  | 474     | 1434   | 353   | Sensory  | 21.0%   | 63.4%  | 15.6% |
| Inter-   | 208     | 1359   | 929   | Inter-   | 8.3%    | 54.5%  | 37.2% |
| Motor    | 30      | 275    | 1332  | Motor    | 1.8%    | 16.8%  | 81.4% |

**Table 4.** Strongly connected components of the chemical network. Note the single giant component and the large number of isolated neurons.

**Giant Component (237 neurons)**

|        |               |         |            |         |        |        |         |                        |
|--------|---------------|---------|------------|---------|--------|--------|---------|------------------------|
| ADAL/R | ALNL/R        | AVFL/R  | CEPVL/R    | LUAL/R  | PVM    | RIH    | RMHL/R  | URYDL/R                |
| ADEL/R | AQR           | AVG     | DA01-06,09 | OLLL/R  | PVNL/R | RIML/R | SAADL/R | URYVL/R                |
| ADFL/R | AS01-06,09,11 | AVHL/R  | DB01-04,07 | OLQDL/R | PVPL/R | RIPL/R | SAAVL/R | VA01-06,08-09,11-12    |
| ADLL/R | ASEL/R        | AVJL/R  | DD01-02,05 | OLQVL/R | PVQL/R | RIR    | SABD    | VB01-06,08-11          |
| AFDL/R | ASGL/R        | AVKL/R  | DVA        | PDA/B   | PVR    | RIS    | SDQL    | VC01-05                |
| AIAL/R | ASHL/R        | AVL     | DVC        | PDEL/R  | PVT    | RIVL/R | SMBDL/R | VD01-03,05-06,08,10-13 |
| AIBL/R | ASJL/R        | AVM     | FLPL/R     | PHAL/R  | PVWL/R | RMDDR  | SMBVL/R |                        |
| AIML/R | ASKL/R        | AWAL/R  | HSNL/R     | PHBL/R  | RIAL/R | RMDL/R | SMDDL/R |                        |
| AINR   | AUAL/R        | AWBL/R  | IL1DL/R    | PLMR    | RIBL/R | RMDVL  | SMDVL/R |                        |
| AIYL/R | AVAL/R        | AWCL/R  | IL1L/R     | PLNL    | RICL/R | RMED   | URADL/R |                        |
| AIZL/R | AVBL/R        | BAGL/R  | IL1VL/R    | PQR     | RID    | RMEV   | URAVL/R |                        |
| ALA    | AVDL/R        | BDUL/R  | IL2L/R     | PVCL/R  | RIFL/R | RMFL/R | URBL/R  |                        |
| ALML/R | AVEL/R        | CEPDL/R | IL2VL/R    | PVDL    | RIGL/R | RMGL/R | URXL/R  |                        |

**Small Component (2 neurons)**

RMDVR RMDDL

**Isolated neurons in chemical network (40 neurons)**

|            |            |         |      |         |         |         |         |            |
|------------|------------|---------|------|---------|---------|---------|---------|------------|
| AINL       | DA07-08    | DVB     | PLML | RMEL/R  | SDQR    | SIAVL/R | SIBVL/R | VB07       |
| ASIL/R     | DB05-06    | IL2DL/R | PLNR | SABVL/R | SIADL/R | SIBDL/R | VA07,10 | VD04,07,09 |
| AS07,08,10 | DD03-04,06 | PHCL/R  | PVDR |         |         |         |         |            |

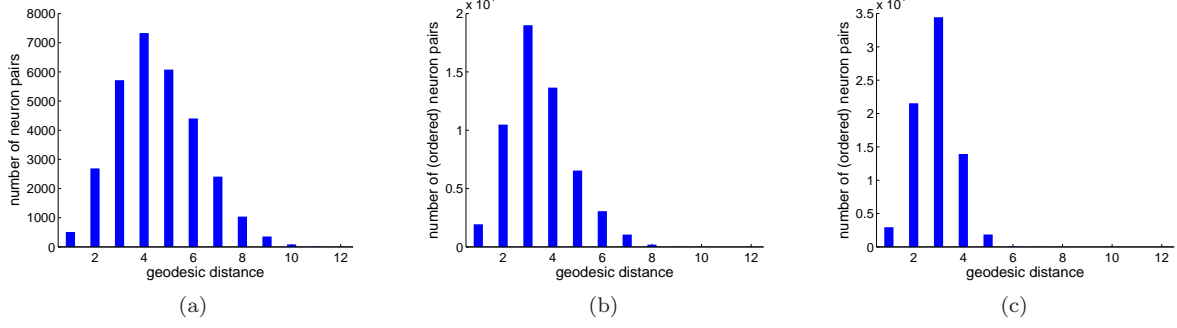

**Figure 1.** Geodesic distance distributions. (a). Giant component of gap junction network. (b). Giant component of chemical network. (c). Giant component of combined network.

**Table 5.** Some structural properties of the *C. elegans* gap junction network, randomly edited networks ( $E_{\text{gap}}$ ), and the AY network [1].

|                              | <i>C. elegans</i> | AY's <i>C. elegans</i> [1] | $E_{\text{gap}}$ |
|------------------------------|-------------------|----------------------------|------------------|
| $d_{\text{edit}}$            | —                 | 454                        | $177 \pm 18.5$   |
| giant component size         | 248               | 253                        | $261 \pm 3.41$   |
| giant component pathlength   | 4.52              | 4.71                       | $4.09 \pm 0.078$ |
| giant component clust. coef. | 0.21              | 0.23                       | $0.14 \pm 0.011$ |

## References

1. Achacoso TB, Yamamoto WS (1992) AY's Neuroanatomy of *C. elegans* for Computation. CRC Press.

**Table 6.** Some structural properties of the *C. elegans* chemical network, randomly edited networks ( $E_{\text{chem}}$ ), and the AY network [1].

|                                     | <i>C. elegans</i> | AY's <i>C. elegans</i> [1] | $E_{\text{chem}}$ |
|-------------------------------------|-------------------|----------------------------|-------------------|
| $d_{\text{edit}}$                   | —                 | 3546                       | $638 \pm 33.2$    |
| weak giant component size           | 279               | 279                        | $279 \pm 0.07$    |
| strong giant component size         | 237               | 239                        | $267 \pm 3.19$    |
| strong giant component pathlength   | 3.48              | 3.99                       | $3.12 \pm 0.028$  |
| strong giant component clust. coef. | 0.22              | 0.20                       | $0.16 \pm 0.006$  |

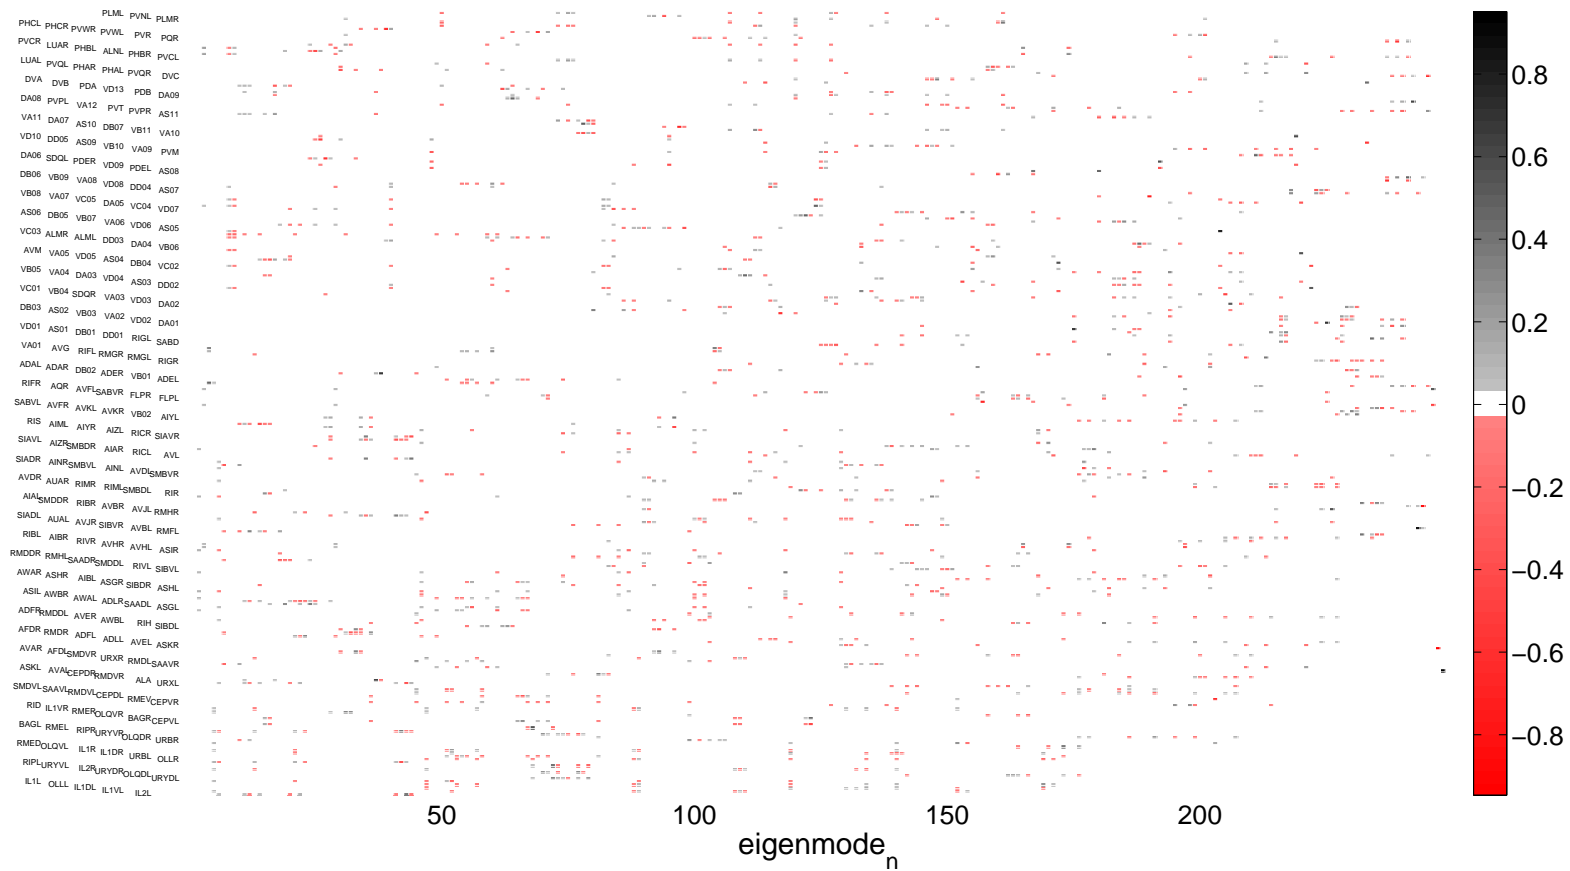

Figure 2. Eigenmodes of Laplacian for giant component of gap junction network.

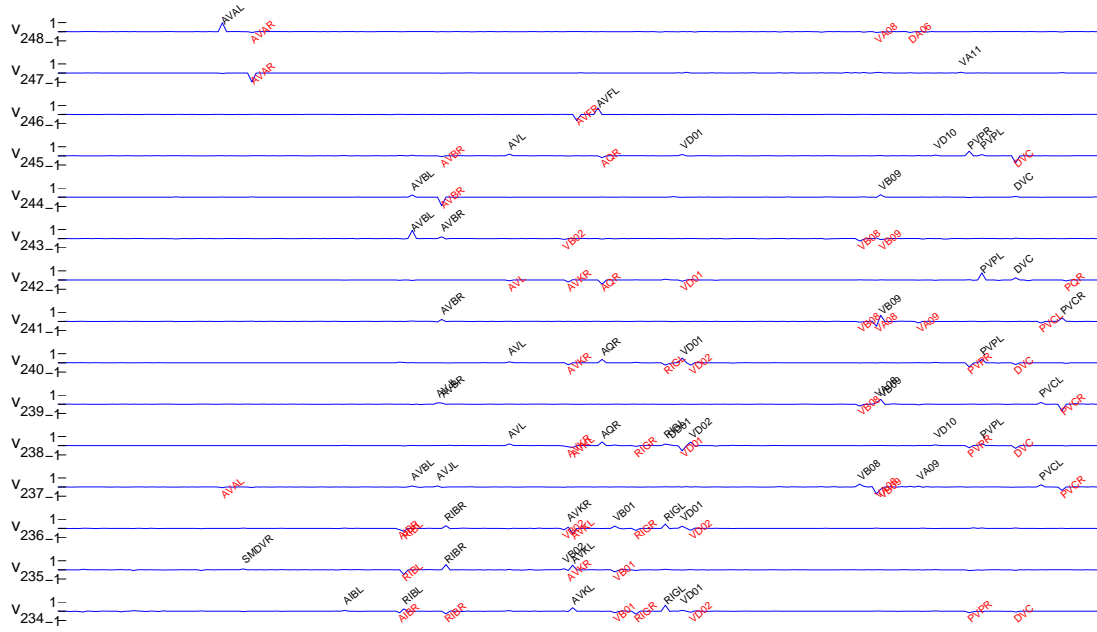

**Figure 3.** Fastest eigenmodes of Laplacian for giant component of gap junction network. Eigenmodes corresponding to  $\lambda_{248}, \lambda_{247}, \dots, \lambda_{234}$  are shown. The eigenmodes are labeled with neurons that take value above a fixed absolute value threshold. Neurons with negative values are in red, whereas neurons with positive values are in black.

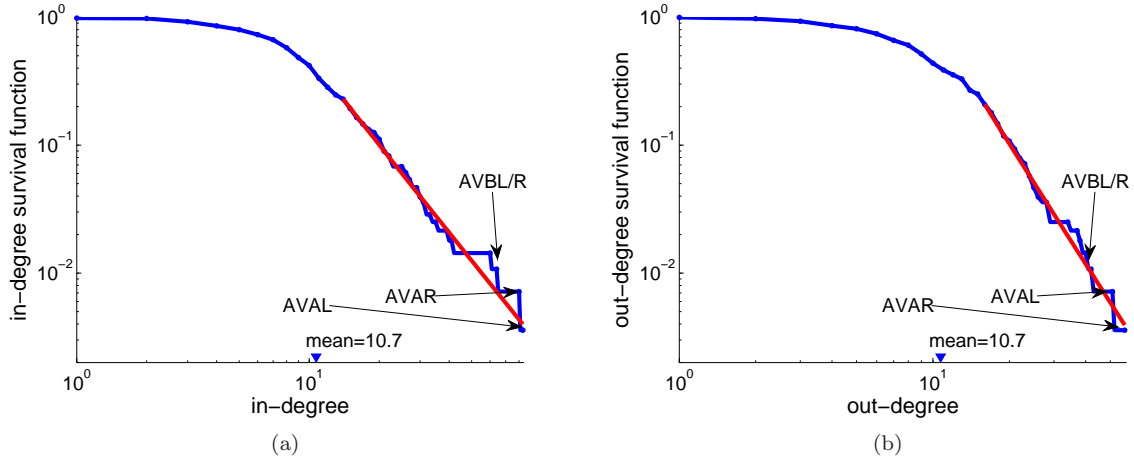

**Figure 4.** Survival functions of the in-degree (a) and out-degree (b) distributions in the combined network. The tails of the distributions can be fit with power laws.
