# Supplementary material for: Structural Properties of the Caenorhabditis elegans Neuronal Network
Source: PLOS journal article supplement (doi:10.1371/journal.pcbi.1001066), 2011-02-03
Supplement: S2 (10.1371/journal.pcbi.1001066.s002) [file journal.pcbi.1001066.s002.pdf]

## Text S2: Algebraic Form of Survival Functions

1

Here we consider several commonly encountered distributions and their survival functions. If a distribution were to follow a power law,  $p(d) \sim d^{-\alpha}$ , then the survival function (under a continuous approximation) also follows a power law:

$$P(d) = \sum_{k=d}^{\infty} k^{-\alpha} \sim d^{-(\alpha-1)}. \quad (1)$$

Similarly, if a distribution follows an exponential decay,  $p(d) \sim e^{-d/\kappa}$ , then the survival function also has an exponential decay, with the same exponent:

$$P(d) = \sum_{k=d}^{\infty} e^{-k/\kappa} \sim e^{-d/\kappa}. \quad (2)$$

If a distribution were to follow the (continuous) stretched exponential distribution,  $p(d) \sim (d/\beta)^{\gamma-1} e^{-(d/\beta)^\gamma}$ , then the survival function would have a decay given by a stretched exponential function with the same stretch factor  $\gamma$ :

$$P(d) = \sum_{k=d}^{\infty} (k/\beta)^{\gamma-1} e^{-(k/\beta)^\gamma} \sim e^{-(d/\beta)^\gamma} \quad (3)$$

[1].

## References

1. Clauset A, Shalizi CR, Newman MEJ (2009) Power-law distributions in empirical data. *SIAM Rev* 51:661–703. doi:10.1137/070710111.
